# Supplementary material for: The LMSz method - an automatable scalable approach to constructing gene-specific growth charts in rare disorders
Source: bioRxiv or medRxiv preprint supplement (doi:10.1101/2024.08.19.24312213), 2024-08-20

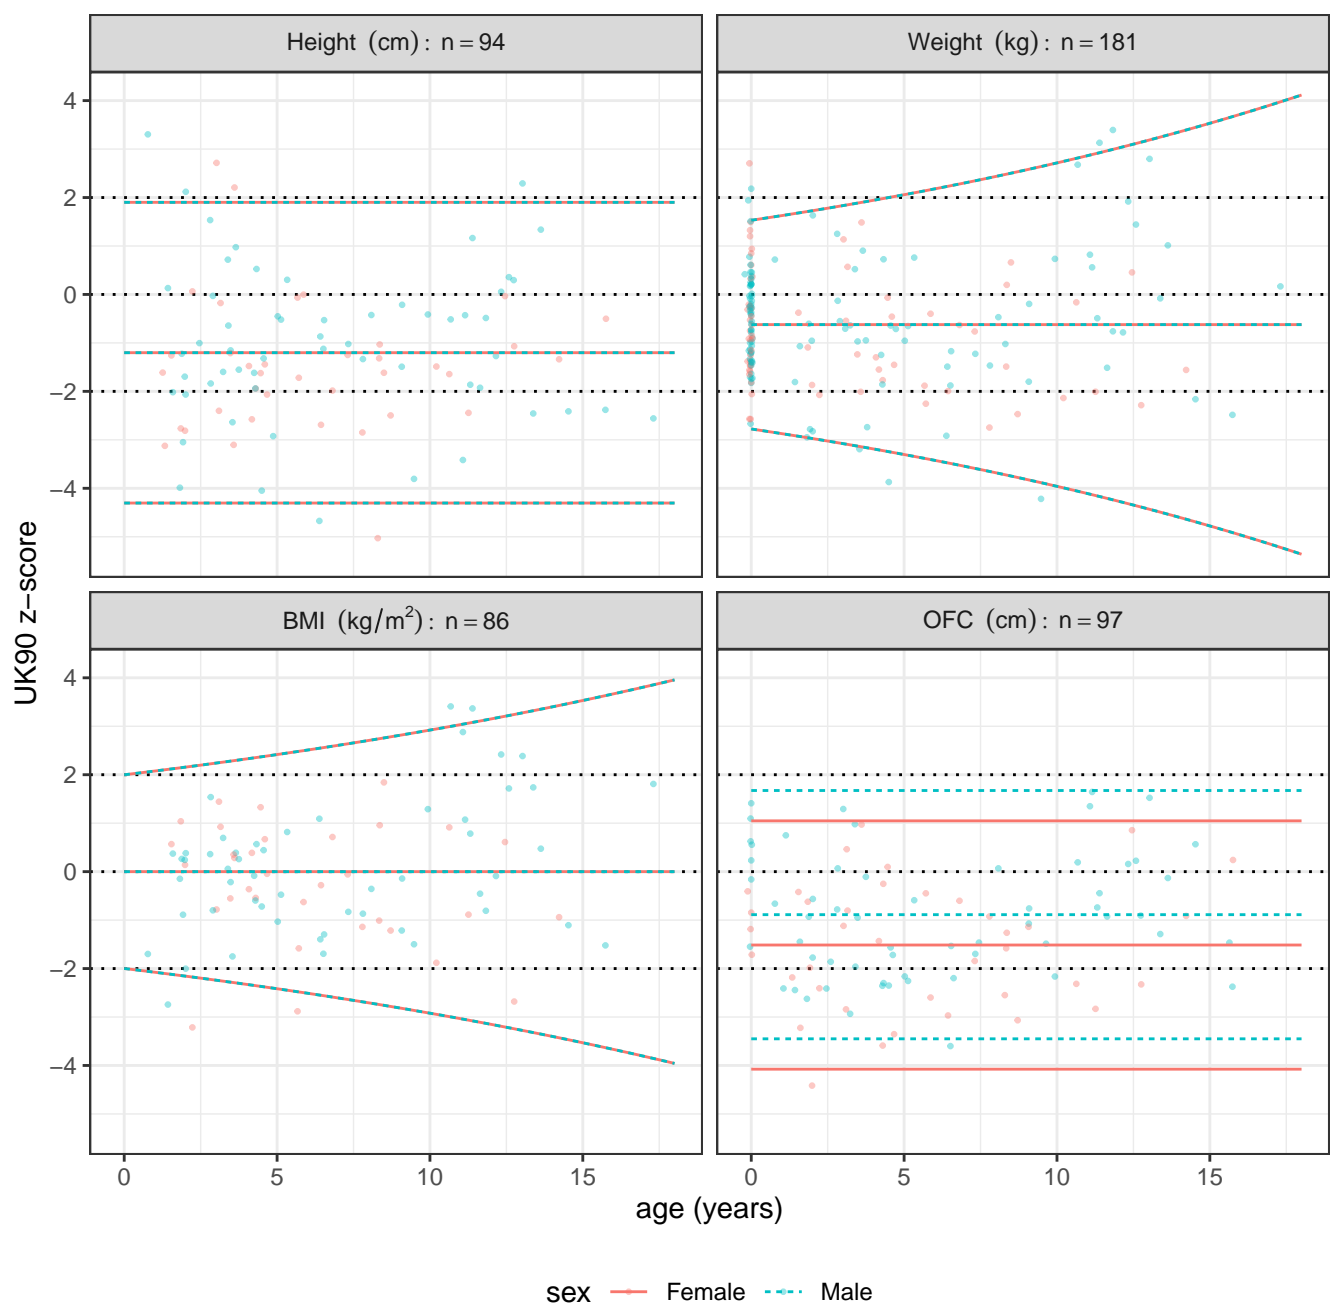

Supplement: Supplementary file [file media-1.pdf]
