# Supplementary material for: The LMSz method - an automatable scalable approach to constructing gene-specific growth charts in rare disorders
Source: bioRxiv or medRxiv preprint supplement (doi:10.1101/2024.08.19.24312213), 2024-08-20
Supplement: Supplementary file [file media-6.pdf]

| Measurement              | ANKRD11 | ARID1B | ASXL3 | DDX3X | KMT2A | SATB2 |
|--------------------------|---------|--------|-------|-------|-------|-------|
| 2nd centile (as z-score) |         |        |       |       |       |       |
| Height                   | -3.8    | -5.2   | -3.2  | -2.8  | -6.2  | -2.7  |
| Weight                   | -3      | -3.4   | -3.9  | -3.4  | -4    | -2    |
| BMI                      | -3.2    | -2.5   | -4.4  | -3.6  | -2.6  | -2    |
| OFC                      | -4.1    | -3.5   | -4.5  | -3.8  | -6.3  | -2.4  |
| 50th centile             |         |        |       |       |       |       |
| Height                   | 20      | 11     | 12    | 50    | 0.08  | 50    |
| Weight                   | 23      | 16     | 23    | 8.8   | 19    | 50    |
| BMI                      | 28      | 33     | 5     | 50    | 29    | 50    |
| OFC                      | 9.8     | 24     | 3.4   | 9.9   | 5.5   | 34    |
| 98th centile             |         |        |       |       |       |       |
| Height                   | 98      | 100    | 79    | 100   | 44    | 100   |
| Weight                   | 93      | 93     | 99    | 76    | 99    | 98    |
| BMI                      | 98      | 94     | 86    | 100   | 93    | 98    |
| OFC                      | 93      | 98     | 80    | 88    | 100   | 94    |
